# Supplementary material for: Brusatol Inhibits Laryngeal Cancer Cell Proliferation and Metastasis Via Abrogating JAK2/STAT3 Signaling Mediated Epithelial-Mesenchymal Transition
Source: Research Square preprint supplement (doi:10.21203/rs.3.rs-355105/v1), 2021-04-12
Supplement: Supplementary file 1 [file 8478be7d7ec0ef2a7fc83a7e.docx]

**Graphical Abstract**


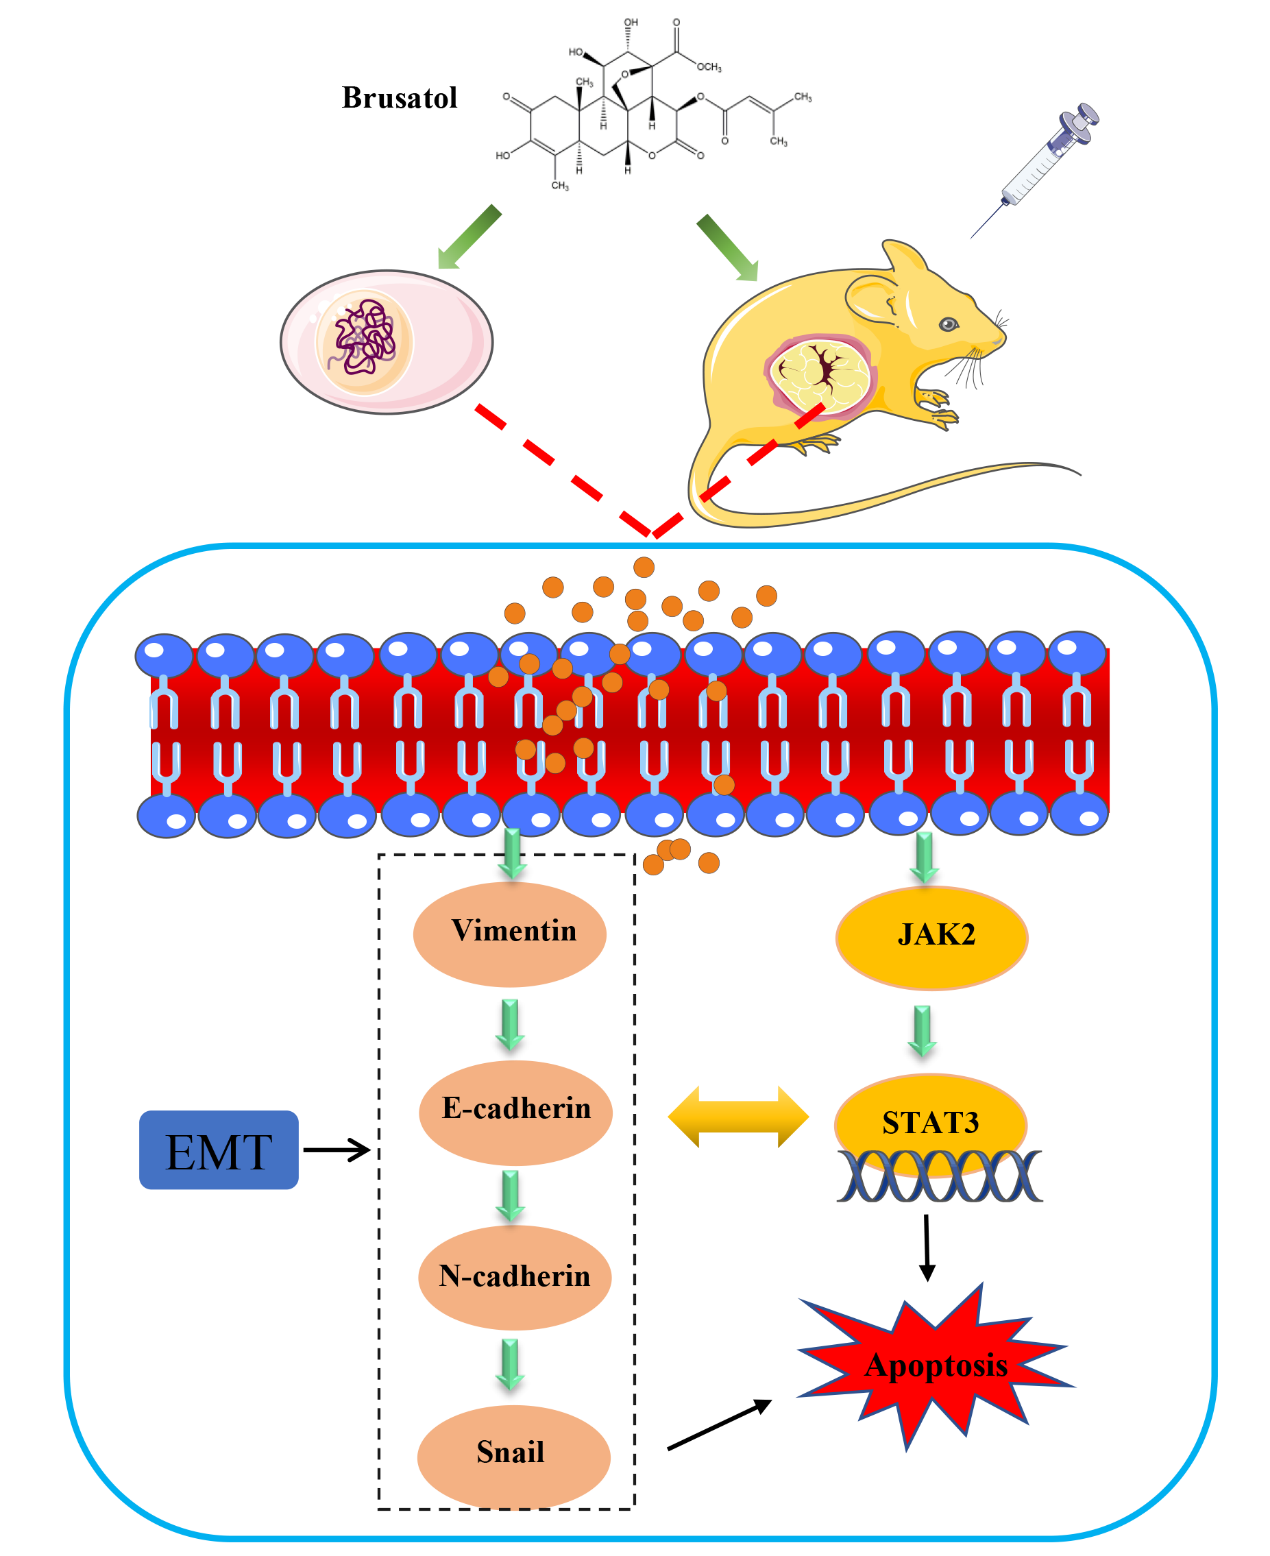


Brusatol significantly suppressed tumor growth and metastasis through abrogating JAK2/STAT3 signaling mediated epithelial-mesenchymal transition
